# Supplementary material for: Identification of thioridazine, an antipsychotic drug, as an antiglioblastoma and anticancer stem cell agent using public gene expression data
Source: PubMed Central journal article supplement (PMC4669717; doi:10.1038/cddis.2015.77), 2015-05-07
Supplement: cddis201577x1.pdf [file cddis201577x1.pdf]

## Supplementary Figures and Tables

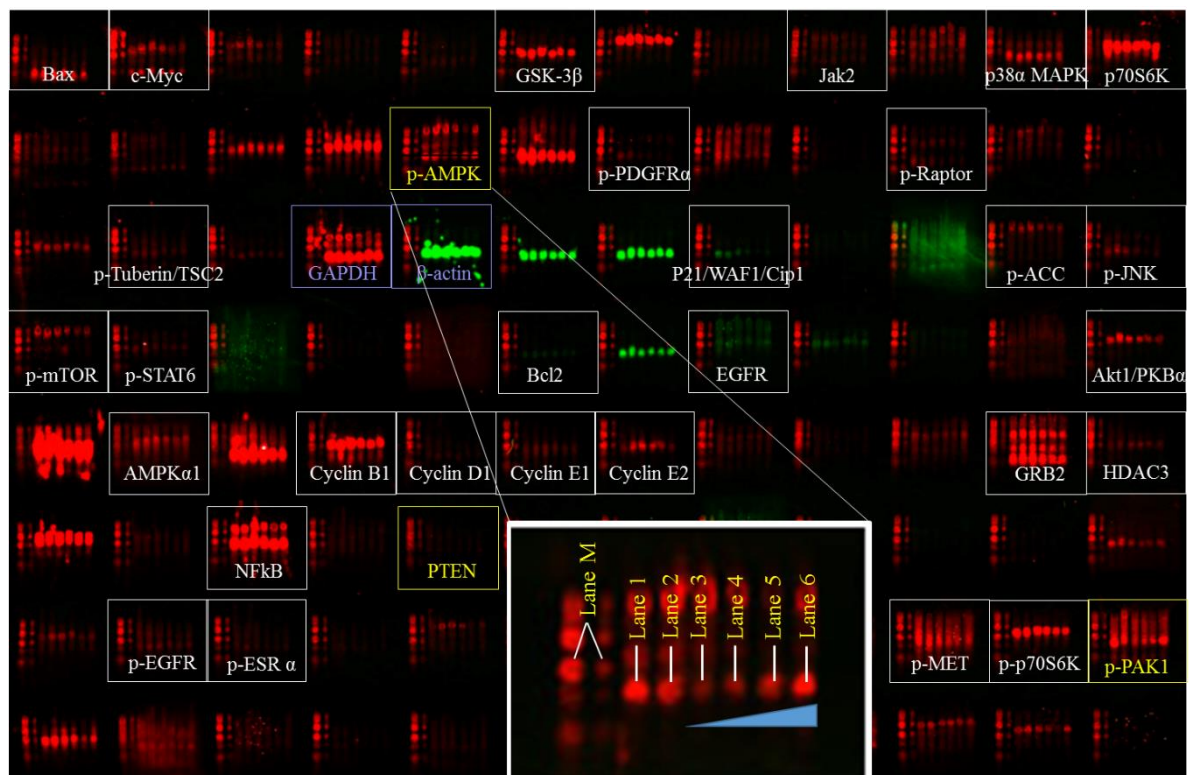

**Supplementary information, Figure S1.** Identification of differential protein expressions from thioridazine and fluphenazine-treated GBM8401 cells *via* microwestern. GBM8401 cells were treated with various drugs for 24 h. Sample serials (each block from left to right): Lane M (Marker), Lane 1 (fluphenazine 20 μM) and Lane 2 (10 μM), Lane 3 (Control), Lane 4 (thioridazine 5 μM), Lane 5 (10 μM), and Lane 6 (15 μM). GAPDH and β-actin as internal control.

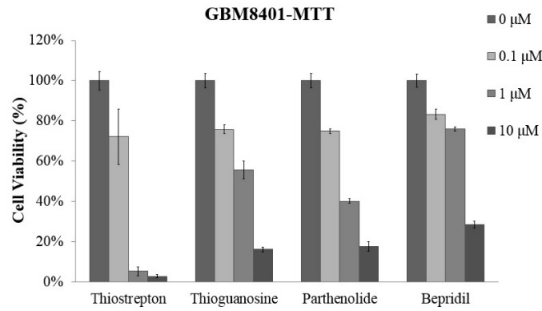

**Supplementary information, Figure S2.** GBM8401 cells were treated with thiostrepton, thioguanosine, parthenolide, and bepridil at concentrations ranging from 0.1 to 10  $\mu\text{M}$ , and the cell viability was determined using an MTT assay.

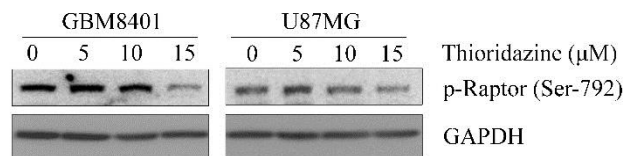

**Supplementary information, Figure S3.** Thioridazine decreased the expression of phospho-Raptor (Ser-792) in GBM cells. GBM8401 and U87MG cells were treated with thioridazine at 5, 10 and 15  $\mu\text{M}$  for 24 h. Phospho-Raptor (Ser-792) was detected by western blotting. GAPDH was used as an internal control.

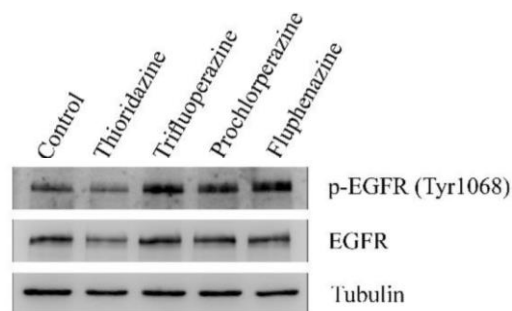

**Supplementary information, Figure S4.** Fluphenazine increased the expression of phospho-epidermal growth factor receptor (p-EGFR) (Tyr-1068) in GBM cells. GBM8401 cells were treated with fluphenazine at 10  $\mu\text{M}$  for 24 h. Phospho-EGFR (Tyr-1068) was detected by western blotting. Tubulin was used as an internal control.

**Supplementary information, Table S1.** Two hundred fifteen drugs predicted by Cmap and the result of tested drugs in GBM8401. If the IC<sub>50</sub> value of the drug was less than 10  $\mu$ M, we defined the drug as an “effective” drug. (“v”: effective in GBM cells. “x”: ineffective in GBM cells. “ND”: not determined.)

| Drug name              | Frequency | Result | Anti-psychotic agent |
|------------------------|-----------|--------|----------------------|
| 1,4-chrysenequinone    | 100%      | ND     |                      |
| 0173570-0000           | 100%      | ND     |                      |
| Repaglinide            | 80%       | x      |                      |
| Procaine               | 80%       | x      |                      |
| Pargyline              | 80%       | x      |                      |
| Luteolin               | 80%       | v      |                      |
| Gliclazide             | 80%       | x      |                      |
| Chrysin                | 80%       | x      |                      |
| Tyloxapol              | 60%       | v      |                      |
| Thiostrepton           | 60%       | v      |                      |
| Sulfamethoxypyridazine | 60%       | ND     |                      |
| Skimmianine            | 60%       | x      |                      |
| Ronidazole             | 60%       | x      |                      |
| Phthalylsulfathiazole  | 60%       | x      |                      |
| Pentoxyverine          | 60%       | ND     |                      |
| Omeprazole             | 60%       | ND     |                      |
| Nipecotic acid         | 60%       | ND     |                      |
| Meticrane              | 60%       | x      |                      |
| Meropenem              | 60%       | ND     |                      |
| Medrysone              | 60%       | x      |                      |
| Levamisole             | 60%       | ND     |                      |
| Ginkgolide A           | 60%       | x      |                      |
| Dipyridamole           | 60%       | x      |                      |
| Apigenin               | 60%       | x      |                      |
| Prestwick-665          | 60%       | x      |                      |
| Prestwick-559          | 60%       | x      |                      |
| DL-thiorphan           | 60%       | x      |                      |
| Zomepirac              | 40%       | ND     |                      |
| Vorinostat             | 40%       | v      |                      |
| Verteporfin            | 40%       | v      |                      |
| Triflusal              | 40%       | x      |                      |
| Tridihexethyl          | 40%       | ND     |                      |
| Trichostatin A         | 40%       | v      |                      |
| Trazodone              | 40%       | x      |                      |
| Thioguanosine          | 40%       | v      |                      |
| Terguride              | 40%       | ND     |                      |
| Sulfametoxydiazine     | 40%       | x      |                      |

|                      |     |    |   |
|----------------------|-----|----|---|
| Sulconazole          | 40% | v  |   |
| Scopolamine N-oxide  | 40% | ND |   |
| Riboflavin           | 40% | ND |   |
| Resveratrol          | 40% | x  |   |
| Piperlongumine       | 40% | v  |   |
| Phenoxybenzamine     | 40% | v  |   |
| Morantel             | 40% | x  |   |
| Monobenzone          | 40% | ND |   |
| Methazolamide        | 40% | ND |   |
| Menadione            | 40% | ND |   |
| Lysergol             | 40% | ND |   |
| Ketanserine          | 40% | ND |   |
| Imipenem             | 40% | ND |   |
| Heliotrine           | 40% | ND |   |
| Fipexide             | 40% | ND |   |
| Eucatropine          | 40% | x  |   |
| Ellipticine          | 40% | v  |   |
| Diltiazem            | 40% | x  |   |
| Chlorzoxazone        | 40% | ND |   |
| Carbachol            | 40% | ND |   |
| Caffeic acid         | 40% | ND |   |
| Bisacodyl            | 40% | ND |   |
| Betaxolol            | 40% | ND |   |
| Bepidil              | 40% | v  |   |
| Antimycin A          | 40% | v  |   |
| Alsterpaullone       | 40% | ND |   |
| Alpha-estradiol      | 40% | x  |   |
| Acepromazine         | 40% | x  | o |
| Prestwick-682        | 40% | ND |   |
| Prestwick-1084       | 40% | x  |   |
| PNU-0230031          | 40% | ND |   |
| PHA-00851261E        | 40% | ND |   |
| N-acetyl-L-leucine   | 40% | ND |   |
| GW-8510              | 40% | v  |   |
| 8-azaguanine         | 40% | v  |   |
| 0297417-0002B        | 40% | ND |   |
| Zimeldine            | 20% | x  |   |
| Yohimbic acid        | 20% | ND |   |
| Velnacrine           | 20% | ND |   |
| Valproic acid        | 20% | ND |   |
| Ursodeoxycholic acid | 20% | ND |   |
| Trimetazidine        | 20% | ND |   |
| Trifluridine         | 20% | ND |   |
| Trifluoperazine      | 20% | v  | o |
| Tretinoin            | 20% | ND |   |

|                     |     |    |   |
|---------------------|-----|----|---|
| Tolfenamic acid     | 20% | ND |   |
| Tolbutamide         | 20% | ND |   |
| Tobramycin          | 20% | ND |   |
| Tinidazole          | 20% | ND |   |
| Tiabendazole        | 20% | ND |   |
| Thioridazine        | 20% | v  | o |
| Thioperamide        | 20% | ND |   |
| Thiamazole          | 20% | ND |   |
| Thalidomide         | 20% | ND |   |
| Tanespimycin        | 20% | v  |   |
| Talampicillin       | 20% | ND |   |
| Sulfamethizole      | 20% | ND |   |
| Streptozocin        | 20% | ND |   |
| Streptomycin        | 20% | ND |   |
| Spiradoline         | 20% | ND |   |
| Solasodine          | 20% | ND |   |
| Semustine           | 20% | x  |   |
| Scriptaid           | 20% | ND |   |
| Roxarsone           | 20% | ND |   |
| Rottlerin           | 20% | ND |   |
| Rimexolone          | 20% | ND |   |
| Quinostatin         | 20% | ND |   |
| Quinethazone        | 20% | ND |   |
| Pyrvinium           | 20% | v  |   |
| Puromycin           | 20% | ND |   |
| Pseudopelletierine  | 20% | ND |   |
| Proxyphylline       | 20% | ND |   |
| Propylthiouracil    | 20% | ND |   |
| Propafenone         | 20% | v  |   |
| Prochlorperazine    | 20% | v  | o |
| Piroxicam           | 20% | ND |   |
| Piperidolate        | 20% | ND |   |
| Piperacetazine      | 20% | ND | o |
| Pipenzolate bromide | 20% | ND |   |
| Phenacetin          | 20% | ND |   |
| Parthenolide        | 20% | v  |   |
| Paroxetine          | 20% | ND |   |
| Oxytetracycline     | 20% | ND |   |
| Oxprenolol          | 20% | ND |   |
| Novobiocin          | 20% | ND |   |
| Norcyclobenzaprine  | 20% | v  |   |
| Nizatidine          | 20% | ND |   |
| Nitrendipine        | 20% | ND |   |
| Natamycin           | 20% | ND |   |

|                       |     |    |   |
|-----------------------|-----|----|---|
| Metyrapone            | 20% | ND |   |
| Methotrexate          | 20% | ND |   |
| Mephenesin            | 20% | ND |   |
| Mepenzolate bromide   | 20% | ND |   |
| Lymecycline           | 20% | ND |   |
| Loracarbef            | 20% | ND |   |
| Lidoflazine           | 20% | ND |   |
| Levonorgestrel        | 20% | x  |   |
| Karakoline            | 20% | ND |   |
| Ifosfamide            | 20% | ND |   |
| Hexestrol             | 20% | x  |   |
| Hexamethonium bromide | 20% | ND |   |
| Harmol                | 20% | ND |   |
| Harmine               | 20% | ND |   |
| Guanethidine          | 20% | ND |   |
| Guaifenesin           | 20% | ND |   |
| Glibenclamide         | 20% | ND |   |
| Fusaric acid          | 20% | ND |   |
| Fluspirilene          | 20% | x  | o |
| Fluorometholone       | 20% | ND |   |
| Flunarizine           | 20% | ND |   |
| Flumetasone           | 20% | ND |   |
| Flecainide            | 20% | ND |   |
| Flavoxate             | 20% | ND |   |
| Famprofazone          | 20% | ND |   |
| Etomidate             | 20% | ND |   |
| Etofenamate           | 20% | ND |   |
| Ethambutol            | 20% | ND |   |
| Etanidazole           | 20% | ND |   |
| Estriol               | 20% | x  |   |
| Emetine               | 20% | v  |   |
| Ebselen               | 20% | ND |   |
| Doxorubicin           | 20% | ND |   |
| Dirithromycin         | 20% | ND |   |
| Dioxybenzone          | 20% | ND |   |
| Dinoprost             | 20% | ND |   |
| Dimenhydrinate        | 20% | ND |   |
| Dihydroergocristine   | 20% | ND |   |
| Dicoumarol            | 20% | ND |   |
| Dexpropranolol        | 20% | ND |   |
| Dequalinium chloride  | 20% | ND |   |
| Deptropine            | 20% | ND |   |
| Daunorubicin          | 20% | v  |   |
| Dacarbazine           | 20% | ND |   |
| Cycloserine           | 20% | v  |   |

|                             |     |    |   |
|-----------------------------|-----|----|---|
| Cromoglicic acid            | 20% | ND |   |
| Cortisone                   | 20% | ND |   |
| Cloperastine                | 20% | v  |   |
| Clomipramine                | 20% | ND |   |
| Cicloheximide               | 20% | ND |   |
| Chlorpromazine              | 20% | v  | o |
| Cefalonium                  | 20% | ND |   |
| Cefalexin                   | 20% | ND |   |
| Carbamazepine               | 20% | ND |   |
| Canrenoic acid              | 20% | ND |   |
| Canavanine                  | 20% | ND |   |
| Camptothecin                | 20% | v  |   |
| Bufexamac                   | 20% | ND |   |
| Bromopride                  | 20% | ND |   |
| Bephenium hydroxynaphthoate | 20% | ND |   |
| Bemegrade                   | 20% | ND |   |
| Atropine                    | 20% | ND |   |
| Atovaquone                  | 20% | ND |   |
| Arachidonic acid            | 20% | ND |   |
| Apramycin                   | 20% | ND |   |
| Amylocaine                  | 20% | ND |   |
| Amrinone                    | 20% | ND |   |
| Amoxapine                   | 20% | x  |   |
| Amiodarone                  | 20% | v  |   |
| Alfaxalone                  | 20% | ND |   |
| Acebutolol                  | 20% | ND |   |
| Y-27632                     | 20% | ND |   |
| S-propranolol               | 20% | ND |   |
| Prestwick-860               | 20% | ND |   |
| Prestwick-685               | 20% | v  |   |
| Prestwick-674               | 20% | ND |   |
| Prestwick-664               | 20% | ND |   |
| MS-275                      | 20% | ND |   |
| LY-294002                   | 20% | ND |   |
| H-7                         | 20% | ND |   |
| CP-690334-01                | 20% | ND |   |
| CP-320650-01                | 20% | ND |   |
| 6-bromoindirubin-3'-oxime   | 20% | ND |   |
| 5707885                     | 20% | ND |   |
| 4,5-dianilinophthalimide    | 20% | ND |   |
| 3-acetylcoumarin            | 20% | ND |   |
| 15-delta prostaglandin J2   | 20% | v  |   |
| 0179445-0000                | 20% | ND |   |
| 0175029-0000                | 20% | ND |   |

**Supplementary information, Table S2.** ConsensusPathDB analysis of common GBM differentially expressed probesets with at least 3 appearances from 5 GBM datasets.

| pathway name<br>(up-regulated genes)                             | set size | candidates contained | p-value  | q-value  | pathway source |
|------------------------------------------------------------------|----------|----------------------|----------|----------|----------------|
| Beta1 integrin cell surface interactions                         | 66       | 7 (10.6%)            | 1.57E-08 | 2.17E-06 | PID            |
| Beta3 integrin cell surface interactions                         | 44       | 5 (11.4%)            | 1.47E-06 | 8.55E-05 | PID            |
| Platelet aggregation inhibitor pathway, pharmacodynamics         | 49       | 5 (10.2%)            | 2.54E-06 | 8.55E-05 | PharmGKB       |
| Intrinsic prothrombin activation pathway                         | 23       | 4 (17.4%)            | 3.10E-06 | 8.55E-05 | PID            |
| Intrinsic prothrombin activation pathway                         | 23       | 4 (17.4%)            | 3.10E-06 | 8.55E-05 | BioCarta       |
| Complement and coagulation cascades                              | 54       | 5 (9.3%)             | 4.14E-06 | 9.51E-05 | Wikipathways   |
| Integrins in angiogenesis                                        | 65       | 5 (7.8%)             | 9.64E-06 | 0.00019  | PID            |
| Complement and coagulation cascades- <i>Homo sapiens</i> (human) | 69       | 5 (7.2%)             | 1.40E-05 | 0.000241 | KEGG           |
| NCAM signaling for neurite out-growth                            | 71       | 5 (7.0%)             | 1.61E-05 | 0.000247 | Reactome       |
| Muscle cell TarBase                                              | 354      | 9 (2.6%)             | 1.86E-05 | 0.000257 | Wikipathways   |
| Extrinsic prothrombin activation pathway                         | 13       | 3 (23.1%)            | 2.43E-05 | 0.00028  | PID            |
| Extrinsic prothrombin activation pathway                         | 13       | 3 (23.1%)            | 2.43E-05 | 0.00028  | BioCarta       |
| Focal adhesion- <i>Homo sapiens</i> (human)                      | 200      | 7 (3.5%)             | 2.93E-05 | 0.000311 | KEGG           |
| Epithelium TarBase                                               | 290      | 8 (2.8%)             | 3.56E-05 | 0.000351 | Wikipathways   |
| ECM-receptor interaction- <i>Homo sapiens</i> (human)            | 85       | 5 (5.9%)             | 3.86E-05 | 0.000356 | KEGG           |
| PLK1 signaling events                                            | 44       | 4 (9.1%)             | 4.43E-05 | 0.000359 | PID            |
| NCAM1 interactions                                               | 44       | 4 (9.1%)             | 4.43E-05 | 0.000359 | Reactome       |
| Amoebiasis- <i>Homo sapiens</i> (human)                          | 108      | 5 (4.7%)             | 0.000111 | 0.000853 | KEGG           |
| Focal adhesion                                                   | 184      | 6 (3.3%)             | 0.000169 | 0.00123  | Wikipathways   |
| Signaling by PDGF                                                | 125      | 5 (4.0%)             | 0.000233 | 0.00153  | Reactome       |
| Integrin                                                         | 125      | 5 (4.0%)             | 0.000233 | 0.00153  | INOH           |
| Inflammatory response pathway                                    | 32       | 3 (9.4%)             | 0.000397 | 0.00238  | Wikipathways   |
| Syndecan-4-mediated signaling                                    | 32       | 3 (9.4%)             | 0.000397 | 0.00238  | PID            |



|                                                                                                                 |     |           |          |         |              |
|-----------------------------------------------------------------------------------------------------------------|-----|-----------|----------|---------|--------------|
| events                                                                                                          |     |           |          |         |              |
| Protein digestion and absorption- <i>Homo sapiens</i> (human)                                                   | 81  | 4 (4.9%)  | 0.00048  | 0.00276 | KEGG         |
| Integrin cell surface interactions                                                                              | 85  | 4 (4.7%)  | 0.000577 | 0.00318 | Reactome     |
| Diabetes pathways                                                                                               | 39  | 3 (7.9%)  | 0.000662 | 0.00352 | Reactome     |
| APC/C-mediated degradation of cell cycle proteins                                                               | 10  | 2 (20.0%) | 0.000888 | 0.00438 | Wikipathways |
| Regulation of insulin-like growth factor (IGF) activity by insulin-like growth factor binding proteins (IGFBPs) | 10  | 2 (20.0%) | 0.000888 | 0.00438 | Wikipathways |
| Regulators of bone mineralization                                                                               | 11  | 2 (18.2%) | 0.00108  | 0.00485 | PID          |
| Regulators of bone mineralization                                                                               | 11  | 2 (18.2%) | 0.00108  | 0.00485 | BioCarta     |
| Syndecan-1-mediated signaling events                                                                            | 45  | 3 (6.7%)  | 0.00109  | 0.00485 | PID          |
| Axon guidance                                                                                                   | 268 | 6 (2.3%)  | 0.0012   | 0.00518 | Reactome     |
| Regulation of insulin-like growth factor (IGF) activity by insulin-like growth factor binding proteins (IGFBPs) | 12  | 2 (16.7%) | 0.0013   | 0.00542 | PID          |
| GRB2 events in EGFR signaling                                                                                   | 14  | 2 (14.3%) | 0.00178  | 0.00681 | Reactome     |
| Regulation of complement cascade                                                                                | 14  | 2 (14.3%) | 0.00178  | 0.00681 | Reactome     |
| Nicotinate and nicotinamide metabolism                                                                          | 14  | 2 (14.3%) | 0.00178  | 0.00681 | SMPDB        |
| SHC1 events in EGFR signaling                                                                                   | 15  | 2 (13.3%) | 0.00204  | 0.00762 | Reactome     |
| Celecoxib pathway, pharmacodynamics                                                                             | 58  | 3 (5.2%)  | 0.00227  | 0.00826 | PharmGKB     |
| Platelet activation, signaling and aggregation                                                                  | 215 | 5 (2.4%)  | 0.00261  | 0.00908 | Reactome     |
| Regulation of insulin-like growth factor (IGF) activity by insulin-like growth factor binding proteins (IGFBPs) | 17  | 2 (11.8%) | 0.00263  | 0.00908 | Reactome     |
| Lymphocyte TarBase                                                                                              | 437 | 7 (1.6%)  | 0.00286  | 0.00962 | Wikipathways |
| Nucleotide metabolism                                                                                           | 19  | 2 (10.5%) | 0.00329  | 0.0106  | Wikipathways |
| Pathways in cancer- <i>Homo sapiens</i> (human)                                                                 | 325 | 6 (1.8%)  | 0.00331  | 0.0106  | KEGG         |
| p53 signaling pathway- <i>Homo sapiens</i> (human)                                                              | 68  | 3 (4.4%)  | 0.00358  | 0.0112  | KEGG         |
| Formation of fibrin clot                                                                                        | 20  | 2 (10.0%) | 0.00364  | 0.0112  | Wikipathways |

|                                                                               |     |          |         |        |          |
|-------------------------------------------------------------------------------|-----|----------|---------|--------|----------|
| (clotting cascade)                                                            |     |          |         |        | ys       |
| GRB2 events in ERBB2 signaling                                                | 23  | 2 (8.7%) | 0.00481 | 0.0141 | Reactome |
| Nicotinate nicotinamide metabolism                                            | 23  | 2 (8.7%) | 0.00481 | 0.0141 | INOH     |
| Complement cascade                                                            | 78  | 3 (3.9%) | 0.00489 | 0.0141 | Reactome |
| Developmental Biology                                                         | 363 | 6 (1.7%) | 0.00545 | 0.0151 | Reactome |
| SHC1 events in ERBB2 signaling                                                | 25  | 2 (8.0%) | 0.00567 | 0.0151 | Reactome |
| VEGFR3 signaling in lymphatic endothelium                                     | 25  | 2 (8.0%) | 0.00567 | 0.0151 | PID      |
| Alpha9 beta1 integrin signaling events                                        | 25  | 2 (8.0%) | 0.00567 | 0.0151 | PID      |
| Nicotinate and nicotinamide metabolism- <i>Homo sapiens</i> (human)           | 26  | 2 (7.7%) | 0.00613 | 0.016  | KEGG     |
| Platelet degranulation                                                        | 85  | 3 (3.6%) | 0.00626 | 0.016  | Reactome |
| Small cell lung cancer- <i>Homo sapiens</i> (human)                           | 84  | 3 (3.6%) | 0.00647 | 0.016  | KEGG     |
| Cdc20: phospho-APC/C mediated degradation of cyclin A                         | 29  | 2 (7.4%) | 0.0066  | 0.016  | Reactome |
| APC/C: Cdc20 mediated degradation of mitotic proteins                         | 29  | 2 (7.4%) | 0.0066  | 0.016  | Reactome |
| Activation of APC/C and APC/C: Cdc20 mediated degradation of mitotic proteins | 30  | 2 (7.1%) | 0.00708 | 0.0167 | Reactome |
| Mitotic prometaphase                                                          | 87  | 3 (3.4%) | 0.00713 | 0.0167 | PID      |
| Response to elevated platelet cytosolic Ca <sup>2+</sup>                      | 90  | 3 (3.4%) | 0.00736 | 0.0169 | Reactome |
| Gap junction- <i>Homo sapiens</i> (human)                                     | 89  | 3 (3.4%) | 0.00759 | 0.0172 | KEGG     |
| Mitotic prometaphase                                                          | 95  | 3 (3.2%) | 0.00908 | 0.0201 | Reactome |
| Formation of fibrin clot (clotting cascade)                                   | 32  | 2 (6.2%) | 0.00919 | 0.0201 | Reactome |
| Cell surface interactions at the vascular wall                                | 99  | 3 (3.1%) | 0.00934 | 0.0201 | Reactome |

| pathway name<br>(down-regulated genes)             | set size | candidates contained | p-value  | q-value  | pathway source |
|----------------------------------------------------|----------|----------------------|----------|----------|----------------|
| Transmission across chemical synapses              | 195      | 20<br>(10.3%)        | 4.66E-14 | 1.93E-11 | Reactome       |
| Neuronal system                                    | 288      | 23 (8.0%)            | 1.07E-13 | 2.22E-11 | Reactome       |
| GABAergic synapse- <i>Homo sapiens</i> (human)     | 89       | 14<br>(15.7%)        | 1.05E-12 | 1.45E-10 | KEGG           |
| Glutamatergic synapse- <i>Homo sapiens</i> (human) | 126      | 13<br>(10.3%)        | 1.61E-09 | 1.67E-07 | KEGG           |
| Neurotransmitter release cycle                     | 36       | 8 (22.2%)            | 5.20E-09 | 4.32E-07 | Reactome       |

|                                                                                        |     |            |          |          |              |
|----------------------------------------------------------------------------------------|-----|------------|----------|----------|--------------|
| Morphine addiction- <i>Homo sapiens</i> (human)                                        | 92  | 11 (12.0%) | 6.49E-09 | 4.49E-07 | KEGG         |
| Synaptic vesicle cycle- <i>Homo sapiens</i> (human)                                    | 64  | 9 (14.1%)  | 3.89E-08 | 2.30E-06 | KEGG         |
| Neurotransmitter receptor binding and downstream transmission in the postsynaptic cell | 141 | 12 (8.5%)  | 6.29E-08 | 3.26E-06 | Reactome     |
| Calcium regulation in the cardiac cell                                                 | 149 | 12 (8.1%)  | 1.16E-07 | 5.35E-06 | Wikipathways |
| Retrograde endocannabinoid signaling- <i>Homo sapiens</i> (human)                      | 102 | 10 (9.8%)  | 2.22E-07 | 9.22E-06 | KEGG         |
| Glutamate neurotransmitter release cycle                                               | 16  | 5 (31.2%)  | 7.00E-07 | 2.64E-05 | Reactome     |
| GABA synthesis, release, reuptake and degradation                                      | 19  | 5 (26.3%)  | 1.81E-06 | 6.27E-05 | Reactome     |
| GABA receptor activation                                                               | 55  | 7 (12.7%)  | 2.70E-06 | 8.63E-05 | Reactome     |
| Glutamate neurotransmitter release cycle                                               | 11  | 4 (36.4%)  | 4.99E-06 | 0.000148 | PID          |
| Serotonin neurotransmitter release cycle                                               | 12  | 4 (33.3%)  | 7.42E-06 | 0.000193 | Reactome     |
| Dopamine neurotransmitter release cycle                                                | 12  | 4 (33.3%)  | 7.42E-06 | 0.000193 | Reactome     |
| G protein signaling pathways                                                           | 92  | 8 (8.7%)   | 9.42E-06 | 0.00021  | Wikipathways |
| Signaling pathway from G protein families                                              | 26  | 5 (19.2%)  | 9.63E-06 | 0.00021  | PID          |
| signaling pathway from G protein families                                              | 26  | 5 (19.2%)  | 9.63E-06 | 0.00021  | BioCarta     |
| L1CAM interactions                                                                     | 97  | 8 (8.2%)   | 1.40E-05 | 0.000268 | Reactome     |
| Recycling pathway of L1                                                                | 28  | 5 (17.9%)  | 1.41E-05 | 0.000268 | Reactome     |
| G alpha (z) signalling events                                                          | 47  | 6 (12.8%)  | 1.42E-05 | 0.000268 | Reactome     |
| Endocrine and other factor-regulated calcium reabsorption- <i>Homo sapiens</i> (human) | 49  | 6 (12.2%)  | 1.81E-05 | 0.000327 | KEGG         |
| Neurotransmitter release cycle                                                         | 15  | 4 (26.7%)  | 1.99E-05 | 0.000333 | Wikipathways |
| Gastric acid secretion- <i>Homo sapiens</i> (human)                                    | 74  | 7 (9.5%)   | 2.01E-05 | 0.000333 | KEGG         |
| Endocytotic role of ndk phosphins and dynamin                                          | 17  | 4 (23.5%)  | 3.42E-05 | 0.000525 | PID          |
| Endocytotic role of ndk phosphins and dynamin                                          | 17  | 4 (23.5%)  | 3.42E-05 | 0.000525 | BioCarta     |
| Cholinergic synapse- <i>Homo sapiens</i> (human)                                       | 112 | 8 (7.1%)   | 3.99E-05 | 0.000591 | KEGG         |
| Axon guidance                                                                          | 268 | 12 (4.5%)  | 4.89E-05 | 0.0007   | Reactome     |
| GPCR signaling-G alpha s                                                               | 272 | 12 (4.4%)  | 6.07E-05 | 0.00084  | INOH         |

|                                                                |     |            |          |          |              |
|----------------------------------------------------------------|-----|------------|----------|----------|--------------|
| Epac and ERK                                                   |     |            |          |          |              |
| Gap junction- <i>Homo sapiens</i> (human)                      | 89  | 7 (7.9%)   | 6.67E-05 | 0.000866 | KEGG         |
| Myometrial relaxation and contraction pathways                 | 155 | 9 (5.8%)   | 6.68E-05 | 0.000866 | Wikipathways |
| Hemostasis                                                     | 471 | 16 (3.4%)  | 7.31E-05 | 0.000919 | Reactome     |
| Endothelins                                                    | 65  | 6 (9.4%)   | 8.47E-05 | 0.000978 | PID          |
| Activation of GABAB receptors                                  | 40  | 5 (12.5%)  | 8.48E-05 | 0.000978 | Reactome     |
| GABA B receptor activation                                     | 40  | 5 (12.5%)  | 8.48E-05 | 0.000978 | Reactome     |
| GPCR signaling-G alpha s PKA and ERK                           | 285 | 12 (4.2%)  | 9.50E-05 | 0.00107  | INOH         |
| Endocytosis- <i>Homo sapiens</i> (human)                       | 202 | 10 (5.0%)  | 0.0001   | 0.00107  | KEGG         |
| Beta-agonist/beta-blocker pathway, pharmacodynamics            | 66  | 6 (9.1%)   | 0.000101 | 0.00107  | PharmGKB     |
| Dopaminergic synapse- <i>Homo sapiens</i> (human)              | 130 | 8 (6.2%)   | 0.000115 | 0.00109  | KEGG         |
| Effects of Botulinum toxin                                     | 9   | 3 (33.3%)  | 0.000116 | 0.00109  | PID          |
| Dopamine neurotransmitter release cycle                        | 9   | 3 (33.3%)  | 0.000116 | 0.00109  | PID          |
| Neurotransmitter release cycle                                 | 9   | 3 (33.3%)  | 0.000116 | 0.00109  | PID          |
| Serotonin neurotransmitter release cycle                       | 9   | 3 (33.3%)  | 0.000116 | 0.00109  | PID          |
| GABA synthesis                                                 | 2   | 2 (100.0%) | 0.000129 | 0.00117  | Reactome     |
| Glutamate dependent acid resistance                            | 2   | 2 (100.0%) | 0.000129 | 0.00117  | HumanCyc     |
| Long-term depression- <i>Homo sapiens</i> (human)              | 70  | 6 (8.6%)   | 0.00014  | 0.00121  | KEGG         |
| Regulation of ck1/cdk5 by type 1 glutamate receptors           | 24  | 4 (16.7%)  | 0.000143 | 0.00121  | PID          |
| Regulation of ck1/cdk5 by type 1 glutamate receptors           | 24  | 4 (16.7%)  | 0.000143 | 0.00121  | BioCarta     |
| Ion channels and their functional role in vascular endothelium | 47  | 5 (10.6%)  | 0.000186 | 0.00151  | BioCarta     |
| Ion channels and their functional role in vascular endothelium | 47  | 5 (10.6%)  | 0.000186 | 0.00151  | PID          |
| GPCR signaling-G alpha i                                       | 262 | 11 (4.2%)  | 0.000193 | 0.00151  | INOH         |
| GPCR signaling-pertussis toxin                                 | 262 | 11 (4.2%)  | 0.000193 | 0.00151  | INOH         |
| Interaction between L1 and Ankyrins                            | 26  | 4 (15.4%)  | 0.000198 | 0.00152  | Reactome     |
| Calcium signaling pathway- <i>Homo sapiens</i> (human)         | 183 | 9 (5.0%)   | 0.000218 | 0.00157  | KEGG         |
| Acetylcholine neurotransmitter release cycle                   | 11  | 3 (27.3%)  | 0.000224 | 0.00157  | Reactome     |

|                                                                          |     |           |          |         |              |
|--------------------------------------------------------------------------|-----|-----------|----------|---------|--------------|
| Acetylcholine neurotransmitter release cycle                             | 11  | 3 (27.3%) | 0.000224 | 0.00157 | PID          |
| Norepinephrine neurotransmitter release cycle                            | 11  | 3 (27.3%) | 0.000224 | 0.00157 | Reactome     |
| Norepinephrine neurotransmitter release cycle                            | 11  | 3 (27.3%) | 0.000224 | 0.00157 | PID          |
| GPCR signaling-cholera toxin                                             | 270 | 11 (4.1%) | 0.000251 | 0.00173 | INOH         |
| Selective serotonin reuptake inhibitor pathway, pharmacodynamics         | 28  | 4 (14.3%) | 0.000267 | 0.00181 | PharmGKB     |
| GPCR signaling-G alpha q                                                 | 274 | 11 (4.0%) | 0.000285 | 0.00191 | INOH         |
| Alanine and aspartate metabolism                                         | 12  | 3 (25.0%) | 0.000296 | 0.00195 | Wikipathways |
| Trafficking of AMPA receptors                                            | 30  | 4 (13.3%) | 0.000351 | 0.00224 | Reactome     |
| Glutamate binding, activation of AMPA receptors and synaptic plasticity  | 30  | 4 (13.3%) | 0.000351 | 0.00224 | Reactome     |
| Effects of calcineurin in keratinocyte differentiation                   | 13  | 3 (23.1%) | 0.000381 | 0.00233 | PID          |
| Effects of calcineurin in keratinocyte differentiation                   | 13  | 3 (23.1%) | 0.000381 | 0.00233 | BioCarta     |
| Recycling pathway of L1                                                  | 13  | 3 (23.1%) | 0.000381 | 0.00233 | PID          |
| Opioid signalling                                                        | 85  | 6 (7.1%)  | 0.000407 | 0.00245 | Reactome     |
| Alanine, aspartate and glutamate metabolism- <i>Homo sapiens</i> (human) | 32  | 4 (12.5%) | 0.000452 | 0.00268 | KEGG         |
| Serotonergic synapse- <i>Homo sapiens</i> (human)                        | 122 | 7 (5.7%)  | 0.000477 | 0.00273 | KEGG         |
| S1P4 pathway                                                             | 15  | 3 (21.4%) | 0.000481 | 0.00273 | PID          |
| Retrograde neurotrophin signalling                                       | 14  | 3 (21.4%) | 0.000481 | 0.00273 | Reactome     |
| G alpha (i) signalling events                                            | 206 | 9 (4.4%)  | 0.000566 | 0.00317 | Reactome     |
| Gamma-aminobutyric acid receptor life cycle pathway                      | 15  | 3 (20.0%) | 0.000596 | 0.00317 | PID          |
| Gamma-aminobutyric acid receptor life cycle pathway                      | 15  | 3 (20.0%) | 0.000596 | 0.00317 | BioCarta     |
| GPCRs, class C metabotropic glutamate, pheromone                         | 15  | 3 (20.0%) | 0.000596 | 0.00317 | Wikipathways |
| Class C/3 (Metabotropic glutamate/pheromone receptors)                   | 15  | 3 (20.0%) | 0.000596 | 0.00317 | Reactome     |
| Ion channel transport                                                    | 61  | 5 (8.2%)  | 0.000634 | 0.00333 | Reactome     |
| Glutamate degradation III ( <i>via</i> 4-aminobutyrate)                  | 4   | 2 (50.0%) | 0.000763 | 0.00396 | HumanCyc     |
| Developmental biology                                                    | 363 | 12 (3.3%) | 0.000805 | 0.00413 | Reactome     |
| Internalization of ErbB1                                                 | 39  | 4 (10.5%) | 0.000881 | 0.00446 | PID          |
| Integration of energy                                                    | 101 | 6 (6.0%)  | 0.000966 | 0.00483 | Reactome     |

|                                                                  |     |           |         |         |              |
|------------------------------------------------------------------|-----|-----------|---------|---------|--------------|
| metabolism                                                       |     |           |         |         |              |
| Melanogenesis- <i>Homo sapiens</i> (human)                       | 101 | 6 (5.9%)  | 0.00102 | 0.00497 | KEGG         |
| Potassium channels                                               | 101 | 6 (5.9%)  | 0.00102 | 0.00497 | Reactome     |
| Nicotine addiction- <i>Homo sapiens</i> (human)                  | 40  | 4 (10.0%) | 0.00107 | 0.00517 | KEGG         |
| EGF-EGFR signaling pathway                                       | 141 | 7 (5.0%)  | 0.00113 | 0.00537 | Wikipathways |
| Long-term potentiation- <i>Homo sapiens</i> (human)              | 70  | 5 (7.1%)  | 0.00119 | 0.00561 | KEGG         |
| Nitric oxide signaling pathway                                   | 19  | 3 (15.8%) | 0.00123 | 0.00566 | PID          |
| Nitric oxide signaling pathway                                   | 19  | 3 (15.8%) | 0.00123 | 0.00566 | BioCarta     |
| Creatine-phosphate biosynthesis                                  | 5   | 2 (40.0%) | 0.00126 | 0.00569 | HumanCyc     |
| Transmembrane transport of small molecules                       | 433 | 13 (3.0%) | 0.00128 | 0.00569 | Reactome     |
| Actions of nitric oxide in the heart                             | 42  | 4 (9.5%)  | 0.00129 | 0.00569 | BioCarta     |
| Actions of nitric oxide in the heart                             | 42  | 4 (9.5%)  | 0.00129 | 0.00569 | PID          |
| PAR1-mediated thrombin signaling events                          | 44  | 4 (9.1%)  | 0.00154 | 0.00671 | PID          |
| PLC beta mediated events                                         | 45  | 4 (8.9%)  | 0.00167 | 0.00723 | Reactome     |
| G protein mediated events                                        | 46  | 4 (8.7%)  | 0.00182 | 0.00769 | Reactome     |
| Proton pump inhibitor pathway, pharmacodynamics                  | 46  | 4 (8.7%)  | 0.00182 | 0.00769 | PharmGKB     |
| Regulation of insulin secretion                                  | 80  | 5 (6.3%)  | 0.00204 | 0.00856 | Reactome     |
| How progesterone initiates the oocyte maturation                 | 23  | 3 (13.0%) | 0.00217 | 0.00892 | PID          |
| How progesterone initiates the oocyte maturation                 | 23  | 3 (13.0%) | 0.00217 | 0.00892 | BioCarta     |
| Cocaine addiction- <i>Homo sapiens</i> (human)                   | 50  | 4 (8.0%)  | 0.00247 | 0.0101  | KEGG         |
| Platelet homeostasis                                             | 85  | 5 (6.0%)  | 0.00267 | 0.0108  | Reactome     |
| Alanine aspartate asparagine metabolism                          | 25  | 3 (12.0%) | 0.00277 | 0.0111  | INOH         |
| Amyotrophic lateral sclerosis (ALS)- <i>Homo sapiens</i> (human) | 53  | 4 (7.5%)  | 0.00306 | 0.0116  | KEGG         |
| TSH                                                              | 26  | 3 (11.5%) | 0.00311 | 0.0116  | NetPath      |
| Inhibition of insulin secretion by adrenaline/noradrenaline      | 26  | 3 (11.5%) | 0.00311 | 0.0116  | Reactome     |
| CXCR4-mediated signaling events                                  | 89  | 5 (5.7%)  | 0.00312 | 0.0116  | PID          |
| Salivary secretion- <i>Homo sapiens</i> (human)                  | 89  | 5 (5.6%)  | 0.00344 | 0.0116  | KEGG         |
| S1P5 pathway                                                     | 8   | 2 (25.0%) | 0.00346 | 0.0116  | PID          |
| Axonal growth inhibition (RHOA activation)                       | 8   | 2 (25.0%) | 0.00346 | 0.0116  | Reactome     |

|                                                                                        |     |           |         |        |              |
|----------------------------------------------------------------------------------------|-----|-----------|---------|--------|--------------|
| Organic anion transporters                                                             | 8   | 2 (25.0%) | 0.00346 | 0.0116 | Reactome     |
| Creatine metabolism                                                                    | 8   | 2 (25.0%) | 0.00346 | 0.0116 | Reactome     |
| Glutamate glutamine metabolism                                                         | 27  | 3 (11.1%) | 0.00347 | 0.0116 | INOH         |
| Transcription factor creb and its extracellular signals                                | 27  | 3 (11.1%) | 0.00347 | 0.0116 | PID          |
| Transcription factor creb and its extracellular signals                                | 27  | 3 (11.1%) | 0.00347 | 0.0116 | BioCarta     |
| Activation of G protein gated potassium channels                                       | 27  | 3 (11.1%) | 0.00347 | 0.0116 | Reactome     |
| G protein gated potassium channels                                                     | 27  | 3 (11.1%) | 0.00347 | 0.0116 | Reactome     |
| Inhibition of voltage gated Ca <sup>2+</sup> channels <i>via</i> G beta/gamma subunits | 27  | 3 (11.1%) | 0.00347 | 0.0116 | Reactome     |
| Basigin interactions                                                                   | 29  | 3 (11.1%) | 0.00347 | 0.0116 | Reactome     |
| L1CAM interactions                                                                     | 27  | 3 (11.1%) | 0.00347 | 0.0116 | Wikipathways |
| T cell receptor signaling pathway                                                      | 55  | 4 (7.3%)  | 0.00351 | 0.0116 | PID          |
| T cell receptor signaling pathway                                                      | 55  | 4 (7.3%)  | 0.00351 | 0.0116 | BioCarta     |
| Antiarrhythmic pathway, pharmacodynamics                                               | 55  | 4 (7.3%)  | 0.00351 | 0.0116 | PharmGKB     |
| Arginine proline metabolism                                                            | 56  | 4 (7.3%)  | 0.00351 | 0.0116 | INOH         |
| Tight junction- <i>Homo sapiens</i> (human)                                            | 132 | 6 (4.6%)  | 0.00381 | 0.0123 | KEGG         |
| Thrombin signaling and protease-activated receptors                                    | 28  | 3 (10.7%) | 0.00385 | 0.0123 | PID          |
| Thrombin signaling and protease-activated receptors                                    | 28  | 3 (10.7%) | 0.00385 | 0.0123 | BioCarta     |
| GPCR Group I metabotropic glutamate receptor                                           | 28  | 3 (10.7%) | 0.00385 | 0.0123 | INOH         |
| Nitric oxide stimulates guanylate cyclase                                              | 28  | 3 (10.7%) | 0.00385 | 0.0123 | Reactome     |
| G alpha (s) signalling events                                                          | 132 | 6 (4.5%)  | 0.00396 | 0.0125 | Reactome     |
| p75NTR regulates axonogenesis                                                          | 9   | 2 (22.2%) | 0.00441 | 0.0139 | Reactome     |
| Fc gamma R-mediated phagocytosis- <i>Homo sapiens</i> (human)                          | 97  | 5 (5.3%)  | 0.00455 | 0.0141 | KEGG         |
| Fmlp induced chemokine gene expression in hmc-1 cells                                  | 30  | 3 (10.0%) | 0.0047  | 0.0141 | PID          |
| Fmlp induced chemokine gene expression in hmc-1 cells                                  | 30  | 3 (10.0%) | 0.0047  | 0.0141 | BioCarta     |
| Role of mef2d in T-cell apoptosis                                                      | 30  | 3 (10.0%) | 0.0047  | 0.0141 | PID          |
| Role of mef2d in T-cell apoptosis                                                      | 30  | 3 (10.0%) | 0.0047  | 0.0141 | BioCarta     |

|                                                                 |     |           |         |        |              |
|-----------------------------------------------------------------|-----|-----------|---------|--------|--------------|
| G protein activation                                            | 30  | 3 (10.0%) | 0.0047  | 0.0141 | Reactome     |
| Nongenotropic androgen signaling                                | 32  | 3 (9.7%)  | 0.00516 | 0.0154 | PID          |
| Taurine and hypotaurine metabolism- <i>Homo sapiens</i> (human) | 10  | 2 (20.0%) | 0.00547 | 0.0158 | KEGG         |
| Regulation of spermatogenesis by crem                           | 10  | 2 (20.0%) | 0.00547 | 0.0158 | PID          |
| Regulation of spermatogenesis by crem                           | 10  | 2 (20.0%) | 0.00547 | 0.0158 | BioCarta     |
| Retrograde neurotrophin signalling                              | 10  | 2 (20.0%) | 0.00547 | 0.0158 | PID          |
| Lysosome vesicle biogenesis                                     | 10  | 2 (20.0%) | 0.00547 | 0.0158 | PID          |
| Hypothetical network for drug addiction                         | 32  | 3 (9.4%)  | 0.00564 | 0.0158 | Wikipathways |
| Bcr signaling pathway                                           | 32  | 3 (9.4%)  | 0.00564 | 0.0158 | BioCarta     |
| Bcr signaling pathway                                           | 32  | 3 (9.4%)  | 0.00564 | 0.0158 | PID          |
| Signaling by robo receptor                                      | 33  | 3 (9.4%)  | 0.00564 | 0.0158 | Reactome     |
| GnRH signaling pathway- <i>Homo sapiens</i> (human)             | 101 | 5 (5.0%)  | 0.00589 | 0.0163 | KEGG         |
| Pancreatic secretion- <i>Homo sapiens</i> (human)               | 101 | 5 (5.0%)  | 0.00589 | 0.0163 | KEGG         |
| Phospholipids as signalling intermediaries                      | 33  | 3 (9.1%)  | 0.00616 | 0.0164 | PID          |
| Phospholipids as signalling intermediaries                      | 33  | 3 (9.1%)  | 0.00616 | 0.0164 | BioCarta     |
| Bioactive peptide induced signaling pathway                     | 33  | 3 (9.1%)  | 0.00616 | 0.0164 | PID          |
| Bioactive peptide induced signaling pathway                     | 33  | 3 (9.1%)  | 0.00616 | 0.0164 | BioCarta     |
| Inwardly rectifying K <sup>+</sup> channels                     | 33  | 3 (9.1%)  | 0.00616 | 0.0164 | Reactome     |
| Regulation of Ras family activation                             | 33  | 3 (9.1%)  | 0.00616 | 0.0164 | PID          |
| Glucagon signaling in metabolic regulation                      | 35  | 3 (8.6%)  | 0.00727 | 0.019  | Reactome     |
| Post NMDA receptor activation events                            | 35  | 3 (8.6%)  | 0.00727 | 0.019  | Reactome     |
| Endothelin                                                      | 35  | 3 (8.6%)  | 0.00727 | 0.019  | Wikipathways |
| Purine nucleotides nucleosides metabolism                       | 109 | 5 (4.6%)  | 0.00778 | 0.0202 | INOH         |
| Ion transport by P-type ATPases                                 | 36  | 3 (8.3%)  | 0.00786 | 0.0203 | Reactome     |
| GABA A receptor activation                                      | 12  | 2 (16.7%) | 0.00791 | 0.0203 | Reactome     |
| Amphetamine addiction- <i>Homo sapiens</i> (human)              | 70  | 4 (5.7%)  | 0.00828 | 0.0211 | KEGG         |
| G13 signaling pathway                                           | 37  | 3 (8.1%)  | 0.00849 | 0.0215 | Wikipathways |



|                                                                            |    |           |         |        |          |
|----------------------------------------------------------------------------|----|-----------|---------|--------|----------|
| CXCR3-mediated signaling events                                            | 38 | 3 (7.9%)  | 0.00914 | 0.0221 | PID      |
| Intracellular signalling through adenosine receptor A2a and adenosine      | 38 | 3 (7.9%)  | 0.00914 | 0.0221 | SMPDB    |
| Intracellular signalling through adenosine receptor A2b and adenosine      | 38 | 3 (7.9%)  | 0.00914 | 0.0221 | SMPDB    |
| Regulation of insulin secretion by glucagon-like peptide-1                 | 38 | 3 (7.9%)  | 0.00914 | 0.0221 | Reactome |
| Aspartate metabolism                                                       | 13 | 2 (15.4%) | 0.00928 | 0.0221 | SMPDB    |
| Adenylate cyclase inhibitory pathway                                       | 13 | 2 (15.4%) | 0.00928 | 0.0221 | Reactome |
| Inhibition of adenylate cyclase pathway                                    | 13 | 2 (15.4%) | 0.00928 | 0.0221 | Reactome |
| Attenuation of GPCR signaling                                              | 13 | 2 (15.4%) | 0.00928 | 0.0221 | PID      |
| Attenuation of GPCR signaling                                              | 13 | 2 (15.4%) | 0.00928 | 0.0221 | BioCarta |
| D-myo-inositol (1,4,5)-trisphosphate degradation                           | 13 | 2 (15.4%) | 0.00928 | 0.0221 | HumanCyc |
| Activation of NMDA receptor upon glutamate binding and postsynaptic events | 39 | 3 (7.7%)  | 0.00982 | 0.0233 | Reactome |

**Supplementary information, Table S3.** Antibodies used in the microwestern assay.

|            |                                                        |            |                                                        |
|------------|--------------------------------------------------------|------------|--------------------------------------------------------|
| <b>A1</b>  | Bax antibody                                           | <b>E1</b>  | Alpha-tubulin                                          |
| <b>A2</b>  | c-Myc (D84C12) XP® rabbit mAb                          | <b>E2</b>  | AMPK $\alpha$ 1, rabbit monoclonal                     |
| <b>A3</b>  | c-Raf antibody                                         | <b>E3</b>  | Cdk4                                                   |
| <b>A4</b>  | FAK antibody                                           | <b>E4</b>  | Cyclin B1 (C-term), clone Y106, rabbit monoclonal      |
| <b>A5</b>  | FGF receptor 1 antibody                                | <b>E5</b>  | Cyclin D1, clone EP272Y, rabbit monoclonal             |
| <b>A6</b>  | GSK-3 $\beta$ (27C10) rabbit mAb                       | <b>E6</b>  | Cyclin E1, clone EP435E rabbit monoclonal              |
| <b>A7</b>  | HSP90 antibody                                         | <b>E7</b>  | Cyclin E2, clone EP454Y, rabbit monoclonal             |
| <b>A8</b>  | Jak1 (6G4) rabbit mAb                                  | <b>E8</b>  | ErbB-2/HER-2                                           |
| <b>A9</b>  | Jak2 (D2E12) XP® rabbit mAb                            | <b>E9</b>  | Estrogen receptor $\alpha$ , clone E115                |
| <b>A10</b> | mTOR (7C10) rabbit mAb                                 | <b>E10</b> | Frizzled 5                                             |
| <b>A11</b> | p38 $\alpha$ MAPK (7D6) rabbit mAb                     | <b>E11</b> | GRB2                                                   |
| <b>A12</b> | p70 S6 kinase (49D7) rabbit mAb                        | <b>E12</b> | HDAC3, clone Y415, rabbit monoclonal; 100 $\mu$ L      |
| <b>B1</b>  | PLC $\gamma$ 2 antibody                                | <b>F1</b>  | HIF-1 $\alpha$                                         |
| <b>B2</b>  | Rb (D20) rabbit mAb                                    | <b>F2</b>  | MDM2                                                   |
| <b>B3</b>  | SAPK/JNK (56G8) rabbit mAb                             | <b>F3</b>  | NF- $\kappa$ B p50, clone E381                         |
| <b>B4</b>  | Src (36D10) rabbit mAb                                 | <b>F4</b>  | PI3 kinase, p110 $\alpha$ rabbit monoclonal            |
| <b>B5</b>  | Phospho-AMPK $\alpha$ (Thr172) (D79.5E) rabbit mAb     | <b>F5</b>  | PI3 kinase, p85, N-SH2, clone UB93-3                   |
| <b>B6</b>  | Phospho-p38 MAPK (Thr180/Tyr182) (D3F9) XP™ rabbit mAb | <b>F6</b>  | PTEN rabbit monoclonal                                 |
| <b>B7</b>  | Phospho-PDGFR $\alpha$ (Tyr1018) antibody              | <b>F7</b>  | Phospho-erbB2 (Thr686), clone 7F8                      |
| <b>B8</b>  | Phospho-PDGFR $\beta$ (Tyr1009) (42F9) rabbit mAb      | <b>F8</b>  | Phospho-GSK3 (Tyr279/Tyr216), clone 5G-2F              |
| <b>B9</b>  | Phospho-PLC $\gamma$ 1 (Tyr783) antibody               | <b>F9</b>  | Phospho-GSK3 $\beta$ (Ser9), clone 2D3                 |
| <b>B10</b> | Phospho-Raptor (Ser792) antibody                       | <b>F10</b> | Phospho-insulin receptor (Tyr 1150/1151), clone 10C3   |
| <b>B11</b> | Phospho-Rb (Ser780) (C84F6) rabbit mAb                 | <b>F11</b> | Phospho-Cdc25C (Ser216), clone E190, rabbit monoclonal |
| <b>B12</b> | Phospho-SAPK/JNK (Thr183/Tyr185) (81E11) rabbit mAb    | <b>F12</b> | Phospho-c-Jun (Ser63), clone Y172; 100 $\mu$ L         |
| <b>C1</b>  | Phospho-Src (Tyr527) antibody                          | <b>G1</b>  | Phospho-c-Myc (Thr58/Ser62)                            |
| <b>C2</b>  | Phospho-Tuberin/TSC2 (Thr1462) (5B12) rabbit mAb       | <b>G2</b>  | Phospho-EGFR (Tyr1086)                                 |
| <b>C3</b>  | Phospho-VEGF receptor 2 (Tyr1059) (D5A6) rabbit mAb    | <b>G3</b>  | Phospho-estrogen receptor $\alpha$ (Ser167)            |

|            |                                                     |            |                                                   |
|------------|-----------------------------------------------------|------------|---------------------------------------------------|
| <b>C4</b>  | GAPDH                                               | <b>G4</b>  | Phospho-FAK (Tyr861)                              |
| <b>C5</b>  | Actin, near a.a. 50-70, clone C4                    | <b>G5</b>  | Phospho-IRS1 (Ser307); 200 $\mu$ L                |
| <b>C6</b>  | APC, C-terminus, clone C-APC 28.9                   | <b>G6</b>  | Phospho-JAK1 (Tyr1022/Tyr1023)                    |
| <b>C7</b>  | CrkL, clone 5-6; 100 $\mu$ g                        | <b>G7</b>  | Phospho-JAK2 (Tyr1007/1008)                       |
| <b>C8</b>  | p21/WAF1/Cip1, clone CP74                           | <b>G8</b>  | Phospho-MAP kinase1/2 (Erk1/2)                    |
| <b>C9</b>  | $\beta$ -Catenin, clone 2H4A7                       | <b>G9</b>  | Phospho-MEK1 (Ser218/222)/MEK2 (Ser222/226)       |
| <b>C10</b> | Phospho-ATM (Ser1981), clone 10H11.E12              | <b>G10</b> | Phospho-Met (Tyr1003)                             |
| <b>C11</b> | Phospho-acetyl CoA carboxylase (Ser79); 200 $\mu$ g | <b>G11</b> | Phospho-p70 S6 kinase (Thr389), rabbit monoclonal |
| <b>C12</b> | Phospho-JNK (Thr183/Tyr185, Thr221/Tyr223)          | <b>G12</b> | Phospho-PAK1 (Ser199/Ser204)                      |
| <b>D1</b>  | Phospho-mTOR (Ser2481); 100 $\mu$ L                 | <b>H1</b>  | Phospho-PKA, RII (Ser96), rabbit monoclonal       |
| <b>D2</b>  | Phospho-STAT6 (Tyr641)                              | <b>H2</b>  | Phospho-PKC $\epsilon$ (Ser729)                   |
| <b>D3</b>  | Phospho-Akt1/PKB $\alpha$ (Ser473), clone 11E6      | <b>H3</b>  | Phospho-PKD (Ser916)                              |
| <b>D4</b>  | Phospho-MKK4 (Ser257/Thr261)                        | <b>H4</b>  | Phospho-PPAR $\gamma$ (Ser82), clone AW504        |
| <b>D5</b>  | Phospho-PKC $\delta$ (Ser645)                       | <b>H5</b>  | Phospho-PTEN (Ser385)                             |
| <b>D6</b>  | Bcl2, clone 100                                     | <b>H6</b>  | Phospho-Src (Tyr416), clone 9A6                   |
| <b>D7</b>  | Cyclin A, clone BF 683                              | <b>H7</b>  | Phospho-c-Raf (Ser338/Tyr340)                     |
| <b>D8</b>  | EGFR, clone LA22                                    | <b>H8</b>  | Phospho-Raf-1 (Tyr340/Tyr341)                     |
| <b>D9</b>  | p53, clone BP53-12                                  | <b>H9</b>  | Phospho-Src (Tyr418)                              |
| <b>D10</b> | PI3 Kinase, p85, N-SH3, clone AB6                   | <b>H10</b> | Phospho-STAT1 (Ser727)                            |
| <b>D11</b> | Acetyl CoA carboxylase 1, rabbit mAb                | <b>H11</b> | Phospho-STAT2 (Tyr689)                            |
| <b>D12</b> | Akt1/PKB $\alpha$ , clone AW24                      | <b>H12</b> | Phospho-STAT5A/B (Tyr694/699), clone A11W         |

**Supplementary information, Table S4.** GBM differentially expressed probesets with at least 4 appearances from 5 GBM datasets.

| probeset<br>(up-regulated) | gene     | times | probeset<br>(down-regulated) | gene                               | times |
|----------------------------|----------|-------|------------------------------|------------------------------------|-------|
| 211980_at                  | COL4A1   | 5     | 221802_s_at                  | KIAA1598                           | 5     |
| 201761_at                  | MTHFD2   | 5     | 213385_at                    | CHN2                               | 5     |
| 219918_s_at                | ASPM     | 4     | 212681_at                    | EPB41L3                            | 5     |
| 219410_at                  | TMEM45A  | 4     | 209576_at                    | GNAI1                              | 5     |
| 219148_at                  | PBK      | 4     | 205814_at                    | GRM3                               | 5     |
| 218883_s_at                | MLF1IP   | 4     | 205637_s_at                  | SH3GL3                             | 5     |
| 218678_at                  | NES      | 4     | 204681_s_at                  | RAPGEF5                            | 5     |
| 218585_s_at                | DTL      | 4     | 204547_at                    | RAB40B                             | 5     |
| 218039_at                  | NUSAP1   | 4     | 222005_s_at                  | GNG3                               | 4     |
| 215076_s_at                | COL3A1   | 4     | 221916_at                    | NEFL                               | 4     |
| 211964_at                  | COL4A2   | 4     | 221805_at                    | NEFL                               | 4     |
| 210809_s_at                | POSTN    | 4     | 219685_at                    | TMEM35                             | 4     |
| 206157_at                  | PTX3     | 4     | 219671_at                    | HPCAL4                             | 4     |
| 205347_s_at                | TMSB15A  | 4     | 219659_at                    | ATP8A2                             | 4     |
| 204915_s_at                | SOX11    | 4     | 219619_at                    | DIRAS2                             | 4     |
| 203820_s_at                | IGF2BP3  | 4     | 219368_at                    | NAP1L2                             | 4     |
| 203819_s_at                | IGF2BP3  | 4     | 218623_at                    | HMP19                              | 4     |
| 203548_s_at                | LPL      | 4     | 214762_at                    | ATP6V1G2                           | 4     |
| 203358_s_at                | EZH2     | 4     | 214434_at                    | HSPA12A                            | 4     |
| 203213_at                  | CDK1     | 4     | 214157_at                    | GNAS                               | 4     |
| 202503_s_at                | KIAA0101 | 4     | 214111_at                    | OPCML                              | 4     |
| 202404_s_at                | COL1A2   | 4     | 214046_at                    | FUT9                               | 4     |
| 202403_s_at                | COL1A2   | 4     | 213938_at                    | ERC2                               | 4     |
| 202007_at                  | NID1     | 4     | 213904_at                    | ---                                | 4     |
| 201984_s_at                | EGFR     | 4     | 213558_at                    | PCLO                               | 4     |
| 201983_s_at                | EGFR     | 4     | 213486_at                    | COPG2IT1                           | 4     |
| 201664_at                  | SMC4     | 4     | 213268_at                    | CAMTA1                             | 4     |
| 201617_x_at                | CALD1    | 4     | 213131_at                    | OLFM1                              | 4     |
| 201292_at                  | TOP2A    | 4     | 213122_at                    | TSPYL5                             | 4     |
|                            |          |       | 213106_at                    | ATP8A1                             | 4     |
|                            |          |       | 212624_s_at                  | CHN1                               | 4     |
|                            |          |       | 212473_s_at                  | MICAL2                             | 4     |
|                            |          |       | 212339_at                    | EPB41L1                            | 4     |
|                            |          |       | 211776_s_at                  | EPB41L3                            | 4     |
|                            |          |       | 211458_s_at                  | GABARAP<br>L1 ///<br>GABARAP<br>L3 | 4     |
|                            |          |       | 211276_at                    | TCEAL2                             | 4     |

|             |          |   |
|-------------|----------|---|
| 210657_s_at | SEPT4    | 4 |
| 210404_x_at | CAMK2B   | 4 |
| 210222_s_at | RTN1     | 4 |
| 210016_at   | MYT1L    | 4 |
| 209990_s_at | GABBR2   | 4 |
| 209956_s_at | CAMK2B   | 4 |
| 209839_at   | DNM3     | 4 |
| 209755_at   | NMNAT2   | 4 |
| 209685_s_at | PRKCB    | 4 |
| 209392_at   | ENPP2    | 4 |
| 209242_at   | PEG3     | 4 |
| 209072_at   | MBP      | 4 |
| 207957_s_at | PRKCB    | 4 |
| 207093_s_at | OMG      | 4 |
| 207010_at   | GABRB1   | 4 |
| 206710_s_at | EPB41L3  | 4 |
| 206385_s_at | ANK3     | 4 |
| 206349_at   | LG11     | 4 |
| 206196_s_at | RUNDC3A  | 4 |
| 205818_at   | DBC1     | 4 |
| 205795_at   | NRXN3    | 4 |
| 205751_at   | SH3GL2   | 4 |
| 205737_at   | KCNQ2    | 4 |
| 205591_at   | OLFM1    | 4 |
| 205352_at   | SERPINI1 | 4 |
| 205348_s_at | DYNC111  | 4 |
| 205278_at   | GAD1     | 4 |
| 205110_s_at | FGF13    | 4 |
| 204995_at   | CDK5R1   | 4 |
| 204953_at   | SNAP91   | 4 |
| 204823_at   | NAV3     | 4 |
| 204793_at   | GPRASP1  | 4 |
| 204777_s_at | MAL      | 4 |
| 204743_at   | TAGLN3   | 4 |
| 204720_s_at | DNAJC6   | 4 |
| 204684_at   | NPTX1    | 4 |
| 204584_at   | L1CAM    | 4 |
| 204466_s_at | SNCA     | 4 |
| 204465_s_at | INA      | 4 |
| 203999_at   | SYT1     | 4 |
| 203798_s_at | VSNL1    | 4 |
| 203797_at   | VSNL1    | 4 |
| 203607_at   | INPP5F   | 4 |
| 203485_at   | RTN1     | 4 |

|             |        |   |
|-------------|--------|---|
| 203001_s_at | STMN2  | 4 |
| 203000_at   | STMN2  | 4 |
| 202890_at   | MAP7   | 4 |
| 202508_s_at | SNAP25 | 4 |
| 202507_s_at | SNAP25 | 4 |
| 202391_at   | BASP1  | 4 |
| 202363_at   | SPOCK1 | 4 |
| 202260_s_at | STXBP1 | 4 |

**Supplementary information, Table S5.** Appearance of phenothiazines from the Cmap analysis of three anti-cancer stem cell signatures.

|                    | <b>Drug Name</b> | <b>Rank</b> | <b>Mean</b> | <b>N</b> | <b>Enrichment</b> | <b>P</b> |
|--------------------|------------------|-------------|-------------|----------|-------------------|----------|
| Wong et al. study  | Trifluoperazine  | 1           | -0.533      | 16       | -0.579            | 0        |
|                    | Prochlorperazine | 2           | -0.538      | 16       | -0.577            | 0        |
|                    | Thioridazine     | 3           | -0.558      | 20       | -0.534            | 0        |
|                    | Chlorpromazine   | 17          | -0.402      | 19       | -0.393            | 0.00389  |
|                    | Fluphenazine     | 21          | -0.494      | 18       | -0.392            | 0.00576  |
|                    | Acepromazine     | 60          | -0.59       | 4        | -0.659            | 0.0306   |
|                    | Promethazine     | 75          | -0.582      | 4        | -0.625            | 0.04884  |
|                    | Perphenazine     | --          | --          | --       | --                | --       |
| Shats et al. study | Trifluoperazine  | 5           | -0.342      | 16       | -0.497            | 0.00028  |
|                    | Prochlorperazine | 9           | -0.329      | 16       | -0.475            | 0.00082  |
|                    | Thioridazine     | 13          | -0.335      | 20       | -0.401            | 0.00189  |
|                    | Chlorpromazine   | --          | --          | --       | --                | --       |
|                    | Fluphenazine     | 43          | -0.291      | 18       | -0.266            | 0.04351  |
|                    | Acepromazine     | --          | --          | --       | --                | --       |
|                    | Promethazine     | --          | --          | --       | --                | --       |
|                    | Perphenazine     | 37          | -0.453      | 5        | -0.589            | 0.03446  |
| Suvà et al. study  | Trifluoperazine  | 47          | -0.371      | 16       | -0.417            | 0.00499  |
|                    | Prochlorperazine | --          | --          | --       | --                | --       |
|                    | Thioridazine     | 11          | -0.407      | 20       | -0.51             | 0        |
|                    | Chlorpromazine   | --          | --          | --       | --                | --       |
|                    | Fluphenazine     | --          | --          | --       | --                | --       |
|                    | Acepromazine     | --          | --          | --       | --                | --       |
|                    | Promethazine     | --          | --          | --       | --                | --       |
|                    | Perphenazine     | --          | --          | --       | --                | --       |

\*(top) The dataset of different gene signatures of ESC and adult stem cells from Wong et al. (2008) [25] is available online (<http://www.ncbi.nlm.nih.gov/geo/>; [GEO Series accession number GSE10423]). Phenothiazine-like anti-psychotics appear frequently when the Cmap drug list is queried with differential ESC-like to adult stem-like cell gene signatures. There are a total of 77 potential drugs with negative enrichments and  $p < 0.05$ . Ranking refers to these 77 potential drugs.

(middle) Shats et al. (2011) [23] study used multiple cancer cell lines with differential stem-like cell characteristics, such as basal gene expression of breast cancer or

CD133-positive versus glioma cells, to query the Cmap database for drugs that reverse the CSC-associated signatures.

(bottom) Suvà et al. (2009) [24] found that EZH2 plays a crucial role in tissue-specific stem-like cell maintenance and is overexpressed in GBM. Treatment with DZNep strongly impairs GBM CSC self-renewal *in vitro* and tumor-initiating capacity *in vivo*. The expression signature was established using CSC enriched gliospheroids from primary GBM cell cultures, with or without DZNep treatment.



**Supplementary information, Table S6.** Up-regulated and down-regulated proteins in the microwestern assay.

**Up-regulation**

| Protein                                      | Samle              | Fold change   |
|----------------------------------------------|--------------------|---------------|
| p-AMPK $\alpha$ (Thr172) (D79.5E) rabbit mAb | Control            | <b>1.000</b>  |
|                                              | Thioridazine 5 uM  | <b>1.287</b>  |
|                                              | Thioridazine 10 uM | <b>1.620</b>  |
|                                              | Thioridazine 15 uM | <b>3.403</b>  |
| PTEN                                         | Control            | <b>1.000</b>  |
|                                              | Thioridazine 5 uM  | <b>1.861</b>  |
|                                              | Thioridazine 10 uM | <b>6.263</b>  |
|                                              | Thioridazine 15 uM | <b>17.899</b> |
| p-PAK1 (Ser199/Ser204)                       | Control            | <b>1.000</b>  |
|                                              | Thioridazine 5 uM  | <b>1.075</b>  |
|                                              | Thioridazine 10 uM | <b>1.033</b>  |
|                                              | Thioridazine 15 uM | <b>3.823</b>  |

**Down-regulation**

| Protein           | Samle              | Fold change  |
|-------------------|--------------------|--------------|
| Bax               | Control            | <b>1.000</b> |
|                   | Thioridazine 5 uM  | <b>0.869</b> |
|                   | Thioridazine 10 uM | <b>0.572</b> |
|                   | Thioridazine 15 uM | <b>0.682</b> |
| c-Myc             | Control            | <b>1.000</b> |
|                   | Thioridazine 5 uM  | <b>0.978</b> |
|                   | Thioridazine 10 uM | <b>0.710</b> |
|                   | Thioridazine 15 uM | <b>0.464</b> |
| GSK-3 $\beta$     | Control            | <b>1.000</b> |
|                   | Thioridazine 5 uM  | <b>0.800</b> |
|                   | Thioridazine 10 uM | <b>0.505</b> |
|                   | Thioridazine 15 uM | <b>0.576</b> |
| p38 $\alpha$ MAPK | Control            | <b>1.000</b> |
|                   | Thioridazine 5 uM  | <b>0.903</b> |
|                   | Thioridazine 10 uM | <b>0.598</b> |
|                   | Thioridazine 15 uM | <b>0.596</b> |
| p70 S6 kinase     | Control            | <b>1.000</b> |
|                   | Thioridazine 5 uM  | <b>0.866</b> |

|                                      |                    |              |
|--------------------------------------|--------------------|--------------|
|                                      | Thioridazine 10 uM | <b>0.496</b> |
|                                      | Thioridazine 15 uM | <b>0.515</b> |
|                                      |                    |              |
| p-acetyl CoA carboxylase             | Control            | <b>1.000</b> |
|                                      | Thioridazine 5 uM  | <b>0.598</b> |
|                                      | Thioridazine 10 uM | <b>0.395</b> |
|                                      | Thioridazine 15 uM | <b>0.414</b> |
|                                      |                    |              |
| p-JNK (Thr183/Tyr185, Thr221/Tyr223) | Control            | <b>1.000</b> |
|                                      | Thioridazine 5 uM  | <b>0.640</b> |
|                                      | Thioridazine 10 uM | <b>0.244</b> |
|                                      | Thioridazine 15 uM | <b>0.373</b> |
|                                      |                    |              |
| p-mTOR (Ser2481)                     | Control            | <b>1.000</b> |
|                                      | Thioridazine 5 uM  | <b>0.850</b> |
|                                      | Thioridazine 10 uM | <b>0.409</b> |
|                                      | Thioridazine 15 uM | <b>0.576</b> |
|                                      |                    |              |
| Akt1/PKB $\alpha$                    | Control            | <b>1.000</b> |
|                                      | Thioridazine 5 uM  | <b>0.785</b> |
|                                      | Thioridazine 10 uM | <b>0.471</b> |
|                                      | Thioridazine 15 uM | <b>0.432</b> |
|                                      |                    |              |
| AMPK $\alpha$ 1                      | Control            | <b>1.000</b> |
|                                      | Thioridazine 5 uM  | <b>0.661</b> |
|                                      | Thioridazine 10 uM | <b>0.512</b> |
|                                      | Thioridazine 15 uM | <b>0.577</b> |
|                                      |                    |              |
| Cyclin B1                            | Control            | <b>1.000</b> |
|                                      | Thioridazine 5 uM  | <b>0.801</b> |
|                                      | Thioridazine 10 uM | <b>0.440</b> |
|                                      | Thioridazine 15 uM | <b>0.433</b> |
|                                      |                    |              |
| Cyclin E1                            | Control            | <b>1.000</b> |
|                                      | Thioridazine 5 uM  | <b>0.746</b> |
|                                      | Thioridazine 10 uM | <b>0.452</b> |
|                                      | Thioridazine 15 uM | <b>0.420</b> |
|                                      |                    |              |
| Cyclin E2                            | Control            | <b>1.000</b> |
|                                      | Thioridazine 5 uM  | <b>0.724</b> |
|                                      | Thioridazine 10 uM | <b>0.467</b> |
|                                      | Thioridazine 15 uM | <b>0.216</b> |
|                                      |                    |              |
| GRB2                                 | Control            | <b>1.000</b> |

|                          |                    |              |
|--------------------------|--------------------|--------------|
|                          | Thioridazine 5 uM  | <b>0.980</b> |
|                          | Thioridazine 10 uM | <b>0.691</b> |
|                          | Thioridazine 15 uM | <b>0.581</b> |
|                          |                    |              |
| HDAC3                    | Control            | <b>1.000</b> |
|                          | Thioridazine 5 uM  | <b>0.977</b> |
|                          | Thioridazine 10 uM | <b>0.673</b> |
|                          | Thioridazine 15 uM | <b>0.602</b> |
|                          |                    |              |
| NF- B p50                | Control            | <b>1.000</b> |
|                          | Thioridazine 5 uM  | <b>0.835</b> |
|                          | Thioridazine 10 uM | <b>0.668</b> |
|                          | Thioridazine 15 uM | <b>0.639</b> |
|                          |                    |              |
| p-p70 S6 kinase (Thr389) | Control            | <b>1.000</b> |
|                          | Thioridazine 5 uM  | <b>0.865</b> |
|                          | Thioridazine 10 uM | <b>0.451</b> |
|                          | Thioridazine 15 uM | <b>0.462</b> |
|                          |                    |              |
| p21/WAF1/Cip1            | Control            | <b>1.000</b> |
|                          | Thioridazine 5 uM  | <b>0.464</b> |
|                          | Thioridazine 10 uM | <b>0.205</b> |
|                          | Thioridazine 15 uM | <b>0.312</b> |
|                          |                    |              |
| Bcl2                     | Control            | <b>1.000</b> |
|                          | Thioridazine 5 uM  | <b>0.989</b> |
|                          | Thioridazine 10 uM | <b>0.661</b> |
|                          | Thioridazine 15 uM | <b>0.646</b> |
|                          |                    |              |
| EGFR                     | Control            | <b>1.000</b> |
|                          | Thioridazine 5 uM  | <b>0.905</b> |
|                          | Thioridazine 10 uM | <b>0.727</b> |
|                          | Thioridazine 15 uM | <b>0.730</b> |
|                          |                    |              |
| Jak2                     | Control            | <b>1.000</b> |
|                          | Thioridazine 5 uM  | <b>0.602</b> |
|                          | Thioridazine 10 uM | <b>0.241</b> |
|                          | Thioridazine 15 uM | <b>0.334</b> |
|                          |                    |              |
| p-Tuberin/TSC2           | Control            | <b>1.000</b> |
|                          | Thioridazine 5 uM  | <b>0.680</b> |
|                          | Thioridazine 10 uM | <b>0.467</b> |
|                          | Thioridazine 15 uM | <b>0.574</b> |
|                          |                    |              |

|                                       |                    |              |
|---------------------------------------|--------------------|--------------|
| p-STAT6                               | Control            | <b>1.000</b> |
|                                       | Thioridazine 5 uM  | <b>0.769</b> |
|                                       | Thioridazine 10 uM | <b>0.649</b> |
|                                       | Thioridazine 15 uM | <b>0.747</b> |
|                                       |                    |              |
| Cyclin D1                             | Control            | <b>1.000</b> |
|                                       | Thioridazine 5 uM  | <b>0.847</b> |
|                                       | Thioridazine 10 uM | <b>0.693</b> |
|                                       | Thioridazine 15 uM | <b>0.562</b> |
|                                       |                    |              |
| p-EGFR (Tyr1086)                      | Control            | <b>1.000</b> |
|                                       | Thioridazine 5 uM  | <b>0.670</b> |
|                                       | Thioridazine 10 uM | <b>0.455</b> |
|                                       | Thioridazine 15 uM | <b>0.554</b> |
|                                       |                    |              |
| p-estrogen receptor $\alpha$ (Ser167) | Control            | <b>1.000</b> |
|                                       | Thioridazine 5 uM  | <b>0.571</b> |
|                                       | Thioridazine 10 uM | <b>0.422</b> |
|                                       | Thioridazine 15 uM | <b>0.592</b> |
|                                       |                    |              |
| p-PDGF receptor $\alpha$ (Tyr1018)    | Control            | <b>1.000</b> |
|                                       | Thioridazine 5 uM  | <b>0.914</b> |
|                                       | Thioridazine 10 uM | <b>0.454</b> |
|                                       | Thioridazine 15 uM | <b>0.539</b> |
|                                       |                    |              |
| p-Raptor (Ser792)                     | Control            | <b>1.000</b> |
|                                       | Thioridazine 5 uM  | <b>0.886</b> |
|                                       | Thioridazine 10 uM | <b>0.600</b> |
|                                       | Thioridazine 15 uM | <b>0.544</b> |
|                                       |                    |              |
| p-Met (Tyr1003)                       | Control            | <b>1.000</b> |
|                                       | Thioridazine 5 uM  | <b>0.744</b> |
|                                       | Thioridazine 10 uM | <b>0.697</b> |
|                                       | Thioridazine 15 uM | <b>0.630</b> |
